# Supplementary material
Source: Springer Nature journal article supplement (https://www.springermedizin.de/resource/supplementary/12904_2013_174_MOESM4_ESM.pdf/9517696)

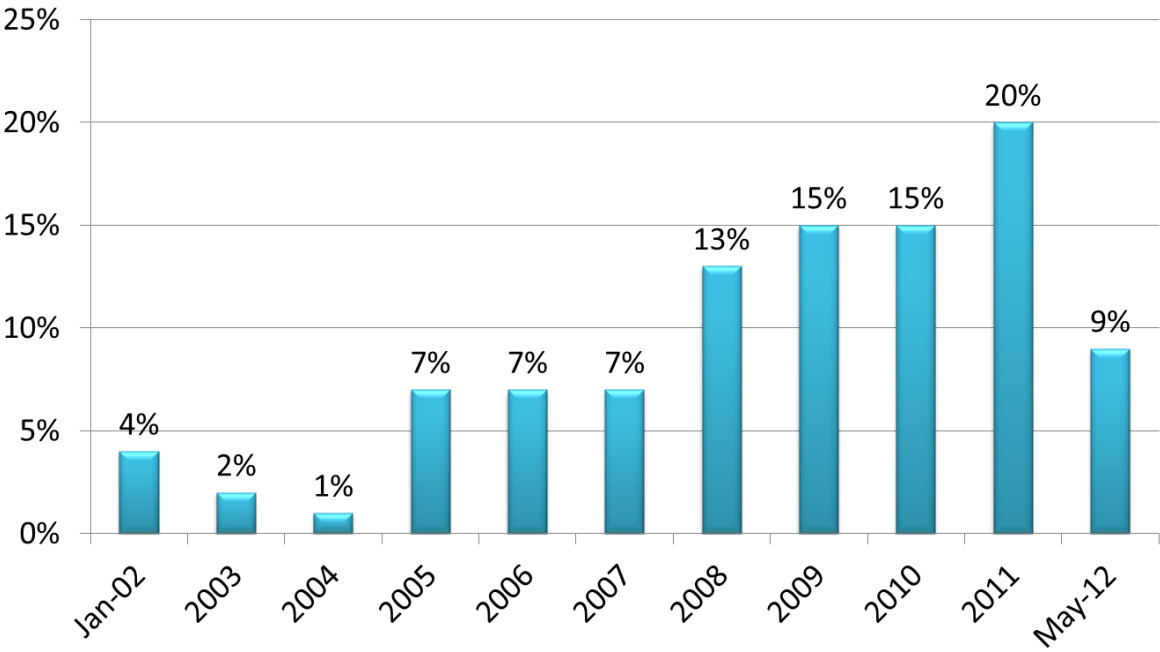

Supplement: MOESM4 [file 9517696]
